# Supplementary material for: Transcriptome profiling of long noncoding RNAs and mRNAs in spinal cord of a rat model of paclitaxel-induced peripheral neuropathy identifies potential mechanisms mediating neuroinflammation and pain
Source: PubMed Central journal article supplement (PMC7890637; doi:10.1186/s12974-021-02098-y), 2021-02-18

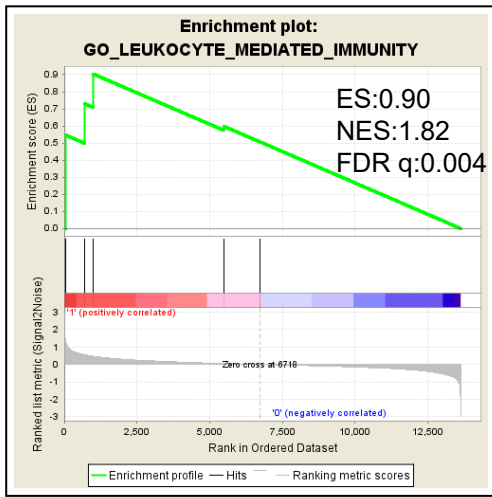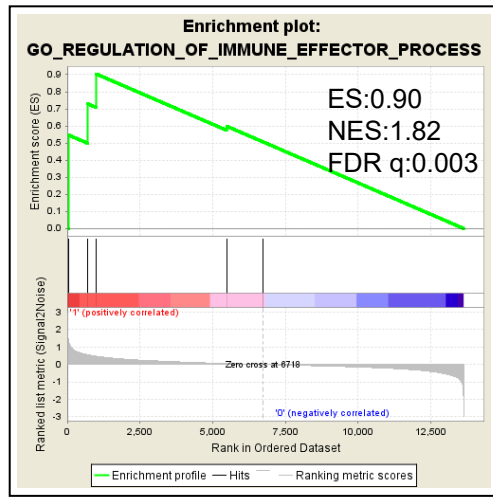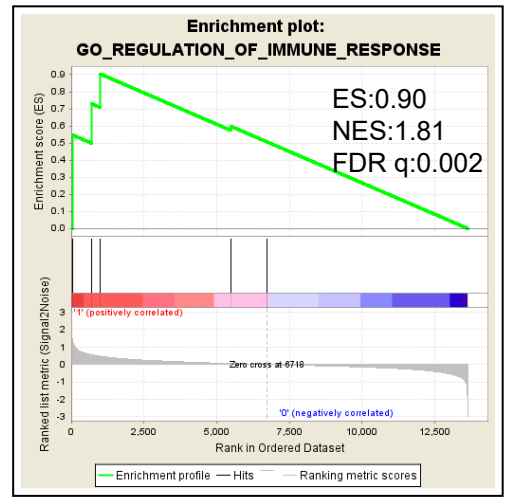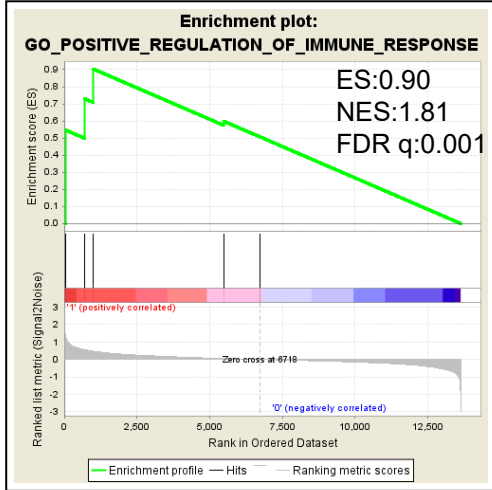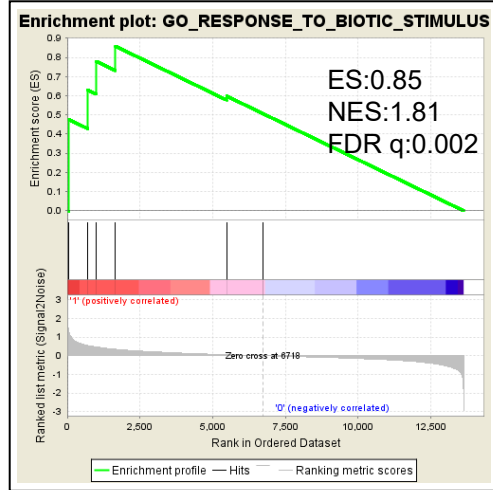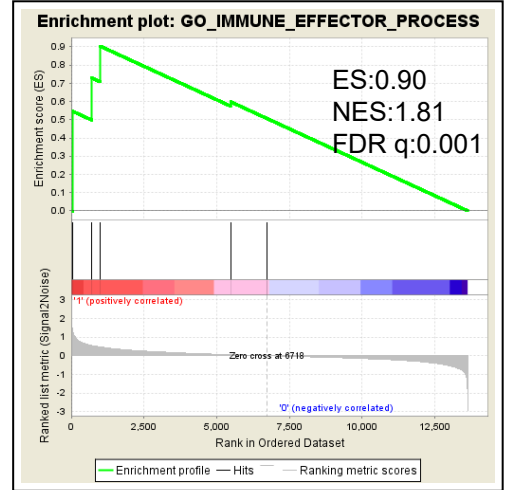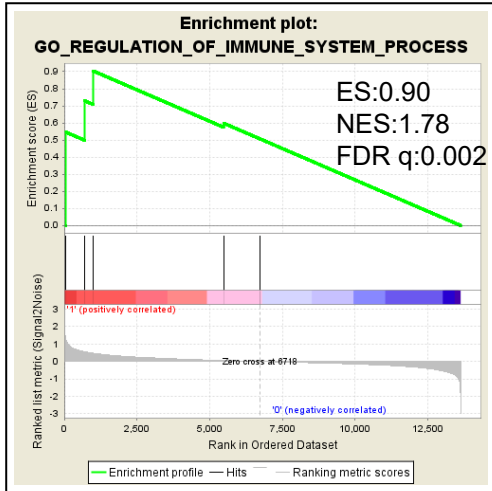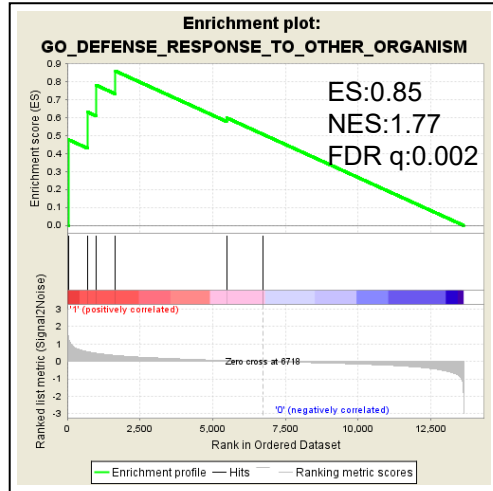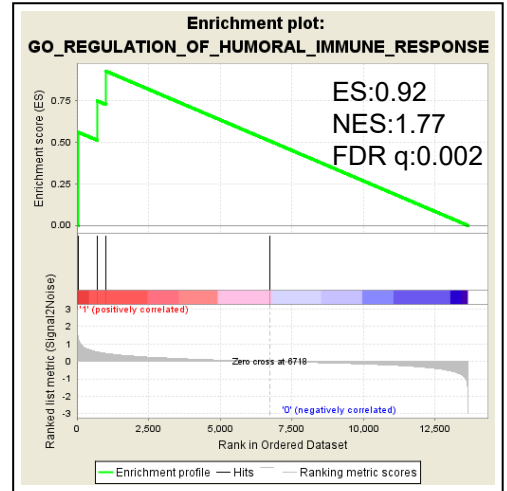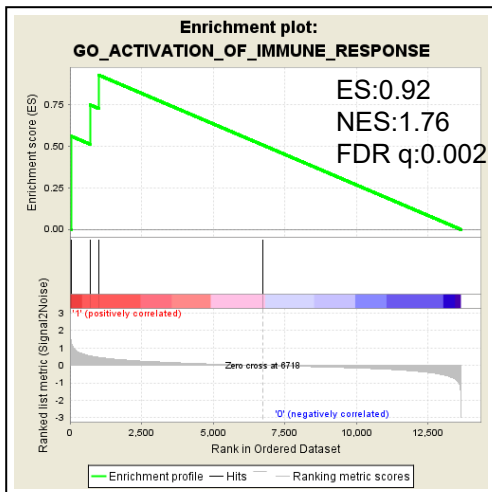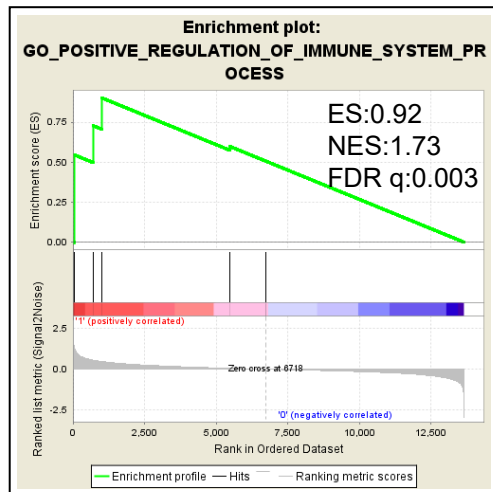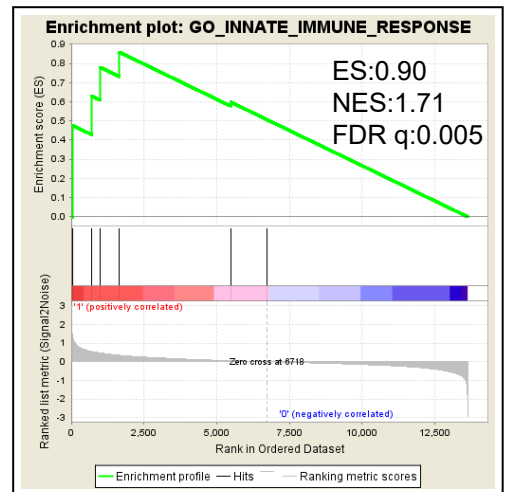

Supplement: 12974_2021_2098_MOESM10_ESM.pdf [file 12974_2021_2098_MOESM10_ESM.pdf]
